# Supplementary material for: Pasteurella multocida activates apoptosis via the FAK-AKT-FOXO1 axis to cause pulmonary integrity loss, bacteremia, and eventually a cytokine storm
Source: Springer Nature journal article supplement (doi:10.1186/s13567-024-01298-7), 2024-04-08
Supplement: MOESM8 [file 13567_2024_1298_MOESM8_ESM.pdf]

| Gene    | gene ID |           | Sequence                 |
|---------|---------|-----------|--------------------------|
| ITGA8   | 241226  | ITGA8-F   | TGGCTGGGATTCCAAGAGGA     |
|         |         | ITGA8-R   | GTGCCCCGACCAATATGTCA     |
| ITGA6   | 16403   | ITGA6-F   | TGCAGAGGGCGAACAGAAC      |
|         |         | ITGA6-R   | GCACACGTCACCACTTTGC      |
| ITGA4   | 16401   | ITGA4-F   | GATGCTGTTGTTGTACTTCGGG   |
|         |         | ITGA4-R   | ACCACTGAGGCATTAGAGAGC    |
| ITGAV   | 16410   | ITGAV-F   | CCGTGGACTTCTTCGAGCC      |
|         |         | ITGAV-R   | CTGTTGAATCAAACCTCAATGGGC |
| ITGA10  | 213119  | ITGA10-F  | TCCGGTCTTCCAGACTGGG      |
|         |         | ITGA10-R  | GAGCTGTGTTATCTTGAAGGGTC  |
| ITGA11  | 319480  | ITGA11-F  | TGCCCCAATGGAAACCAATG     |
|         |         | ITGA11-R  | CACTCGTGCGACCAGAGAG      |
| ITGA1   | 109700  | ITGA1-F   | CCTTCCCTCGGATGTGAGTCA    |
|         |         | ITGA1-R   | AAGTTCTCCCCGTATGGTAAGA   |
| ITGA2   | 16398   | ITGA2-F   | TGTCTGGCGTATAATGTTGGC    |
|         |         | ITGA2-R   | CTTGTGGGTTTCGTAAGCTGCT   |
| ITGA3   | 16400   | ITGA3-F   | CCTCTTCGGCTACTCGGTC      |
|         |         | ITGA3-R   | CCGGTTGGTATAGTCATCACCC   |
| ITGA5   | 16402   | ITGA5-F   | CTTCTCCGTGGAGTTTTACCG    |
|         |         | ITGA5-R   | GCTGTCAAATTGAATGGTGGTG   |
| ITGA7   | 16404   | ITGA7-F   | CTGCTGTGGAAGCTGGGATTC    |
|         |         | ITGA7-R   | CTCCTCCTTGAAGCTGCTGTCG   |
| ITGA9   | 104099  | ITGA9-F   | AAGTGTCGTGTCCATACCAAC    |
|         |         | ITGA9-R   | GGTCTGCTTCGTAGTAGATGTTT  |
| ITGA2B  | 16399   | ITGA2B-F  | TTCTTGGGTCCTAGTGCTGTT    |
|         |         | ITGA2B-R  | CGCTTCCATGTTTGTCCATTATGA |
| Tnfsf10 | 22035   | Tnfsf10-F | ATGGTGATTTGCATAGTGCTCC   |
|         |         | Tnfsf10-R | GCAAGCAGGGTCTGTTCAAGA    |
| Bim     | 12125   | Bim-F     | GACAGAACCGCAAGACAGGAG    |
|         |         | Bim-R     | GGACTTGGGGTTTTGTGTTGAC   |
| Plk3    | 12795   | Plk3-F    | GCACATCCATCGGTCATCCAG    |
|         |         | Plk3-R    | GCCACAGTCAAACCTTCTTCAA   |
| Klf-2   | 16598   | Klf-2-F   | CTCAGCGAGCCTATCTTGCC     |
|         |         | Klf-2-R   | CACGTTGTTTAGGTCCTCATCC   |
| β-Actin | 11461   | β-Actin-F | GGCTGTATTCCCCTCCATCG     |
|         |         | β-Actin-R | CCAGTTGGTAACAATGCCATGT   |
